# Supplementary material
Source: PubMed Central journal article supplement (PMC1976225)
Supplement: pnas_0703402104_1.pdf [file pnas_0703402104_1.pdf]

**Table 1. Data collection and refinement statistics**

|                                                        |                                   |
|--------------------------------------------------------|-----------------------------------|
| Protein                                                | PCSK9                             |
| Space group                                            | $P2_12_12_1$                      |
| Unit cell parameters, Å                                | $a=62.425$ $b=70.147$ $c=148.585$ |
| Wavelength, Å                                          | 1.0                               |
| Resolution range, Å                                    | 50.0-1.9                          |
| No. unique refs. (observed)                            | 52,284 (208,447)                  |
| Completeness, % (highest shell)                        | 99.9(99.9)                        |
| $R_{\text{merge}}$ , % (highest shell)                 | 7.2 (69.9)                        |
| Highest Resolution Shell, Å                            | 1.97-1.9                          |
| Mean $I/\sigma(I)$                                     | 22.5 (2.9)                        |
| Refinement                                             |                                   |
| No. of reflections, total                              | 49,516                            |
| No of reflections, test                                | 2,654                             |
| $R_{\text{cryst}}$ ( $R_{\text{free}}$ *) <sup>†</sup> | 0.19 (0.24)                       |
| No. protein atoms                                      | 8,677                             |
| No. hetero atoms                                       | 341                               |
| rmsd bonds, Å                                          | 0.016                             |
| rmsd angles, °                                         | 1.52                              |
| Average isotropic B-value, Å <sup>2</sup>              | 25.447                            |
| ESU based on $R_{\text{free}}$ , Å <sup>‡</sup>        | 0.143                             |

\* $R_{\text{free}}$  = as for  $R_{\text{cryst}}$ , but for 5.0% of the total reflections chosen at random and omitted from refinement.

<sup>†</sup> $R_{\text{factor}} = \sum |I_i - \langle I_i \rangle| / \sum I_i$  where  $I_i$  is the scaled intensity of the  $i$ th measurement, and  $\langle I_i \rangle$  is the mean intensity for that reflection.

<sup>‡</sup>Estimated overall coordinate error ( $I$ ).

1. Tickle IJ, Laskowski RA, Moss DS (1998) *Acta Crystallogr D* 54:243.
