# Supplementary material
Source: PubMed Central journal article supplement (PMC1976225)
Supplement: pnas_0703402104_2.pdf [file pnas_0703402104_2.pdf]

**Table 2. Matches within the human proteome for disulfide rich domain motif**

| GenBank                       | Common name                                                                                                                            | No. of motifs |
|-------------------------------|----------------------------------------------------------------------------------------------------------------------------------------|---------------|
| gi156237021 refNP_115823.3    | Fibrillin 3 precursor [ <i>Homo sapiens</i> ]                                                                                          | 8             |
| gi166346695 refNP_001990.2    | Fibrillin 2 precursor [ <i>H. sapiens</i> ]                                                                                            | 8             |
| gi124430141 refNP_000129.2    | Fibrillin 1 precursor [ <i>H. sapiens</i> ]                                                                                            | 8             |
| gi189034601 refXP_946095.1    | PREDICTED: similar to otogelin [ <i>H. sapiens</i> ]                                                                                   | 5             |
| gi189033835 refXP_291816.5    | PREDICTED: similar to otogelin [ <i>H. sapiens</i> ]                                                                                   | 5             |
| gi113430815 refXP_001133083.1 | PREDICTED: hypothetical protein [ <i>H. sapiens</i> ]<br>Protein convertase subtilisin/kexin type 9                                    | 3             |
| gi131317307 refNP_777596.2    | preproprotein [ <i>H. sapiens</i> ]                                                                                                    | 3             |
| gi114249622 refNP_116265.1    | jub, ajuba homolog isoform 1 [ <i>H. sapiens</i> ]                                                                                     | 2             |
| gi113423422 refXP_931215.2    | PREDICTED: similar to otogelin [ <i>H. sapiens</i> ]                                                                                   | 2             |
| gi151558724 refNP_112217.2    | ADAM metalloproteinase with thrombospondin type 1 motif, 12 preproprotein [ <i>H. sapiens</i> ]                                        | 2             |
| gi189363020 refNP_694540.3    | Nuclear transcription factor, X-box binding-like 1 [ <i>H. sapiens</i> ]                                                               | 2             |
| gi173765552 refNP_055084.3    | ADAM metalloproteinase domain 29<br>preproprotein [ <i>H. sapiens</i> ]                                                                | 2             |
| gi118497288 refNP_066548.2    | Latent transforming growth factor beta binding protein 3 [ <i>H. sapiens</i> ]                                                         | 2             |
| gi146249406 refNP_996816.1    | Usherin isoform B [ <i>H. sapiens</i> ]                                                                                                | 2             |
| gi1134233847 refXP_945424.2   | PREDICTED: similar to otogelin [ <i>H. sapiens</i> ]                                                                                   | 2             |
| gi173747889 refNP_003174.3    | ADAM metalloproteinase domain 17<br>preproprotein [ <i>H. sapiens</i> ]                                                                | 2             |
| gi14557251 refNP_001101.1     | ADAM metalloproteinase domain 10 [ <i>H. sapiens</i> ]                                                                                 | 2             |
| gi132307109 refNP_542181.1    | WAP four-disulfide core domain 3 isoform 1<br>precursor [ <i>H. sapiens</i> ]                                                          | 2             |
| gi113430799 refXP_001132875.1 | PREDICTED: hypothetical protein [ <i>H. sapiens</i> ]<br>NACHT, leucine rich repeat and PYD containing 9 protein [ <i>H. sapiens</i> ] | 2             |
| gi133519450 refNP_789790.2    | PREDICTED: similar to odd Oz/ten-m homolog 3 isoform 1 [ <i>H. sapiens</i> ]                                                           | 2             |
| gi188978283 refXP_371717.3    | 3 isoform 1 [ <i>H. sapiens</i> ]                                                                                                      | 1             |
| gi114192941 refNP_115821.1    | MEGF11 protein [ <i>H. sapiens</i> ]                                                                                                   | 1             |

| GenBank                        | Common name                                                                                                                                                                                                                               | No. of motifs |
|--------------------------------|-------------------------------------------------------------------------------------------------------------------------------------------------------------------------------------------------------------------------------------------|---------------|
| gi21361543 reflNP_057567.3     | PHD finger protein 7 isoform 1 [ <i>H. sapiens</i> ]                                                                                                                                                                                      | 1             |
| gi30387652 reflNP_848128.1     | late cornified envelope 1C [ <i>H. sapiens</i> ]                                                                                                                                                                                          | 1             |
| gi41281450 reflNP_055509.2     | ADAMTS-like 2 [ <i>H. sapiens</i> ]                                                                                                                                                                                                       | 1             |
| gi33620749 reflNP_060239.2     | Hypothetical protein LOC55632 [ <i>H. sapiens</i> ]                                                                                                                                                                                       | 1             |
| gi113430813 reflXP_001133069.1 | PREDICTED: hypothetical protein [ <i>H. sapiens</i> ]                                                                                                                                                                                     | 1             |
| gi127734789 reflNP_775862.1    | Hypothetical protein LOC283310 [ <i>H. sapiens</i> ]                                                                                                                                                                                      | 1             |
| gi24496783 reflNP_724781.1     | Colony stimulating factor 3 receptor isoform c precursor [ <i>H. sapiens</i> ]                                                                                                                                                            | 1             |
| gi22749221 reflNP_689807.1     | Sprouty-related protein 1 with EVH-1 domain [ <i>H. sapiens</i> ]                                                                                                                                                                         | 1             |
| gi4508011 reflNP_003444.1      | Zinc finger protein 198 [ <i>H. Sapiens</i> ]                                                                                                                                                                                             | 1             |
| gi169354859 reflNP_001100.2    | ADAM metalloproteinase domain 8 precursor [ <i>H. sapiens</i> ]                                                                                                                                                                           | 1             |
| gi37574606 reflNP_932072.1     | Zinc finger protein 198 [ <i>H. sapiens</i> ]                                                                                                                                                                                             | 1             |
| gi113416819 reflXP_047995.10   | PREDICTED: similar to odd Oz/ten-m homolog 2 isoform 1 [ <i>H. sapiens</i> ]                                                                                                                                                              | 1             |
| gi188986194 reflXP_936549.1    | PREDICTED: similar to odd Oz/ten-m homolog 2 isoform 3 [ <i>H. sapiens</i> ]                                                                                                                                                              | 1             |
| gi113425833 reflXP_001130900.1 | PREDICTED: similar to Proprotein convertase subtilisin/kexin type 6 precursor (Paired basic amino acid cleaving enzyme 4) (Subtilisin/kexin-like protease PACE4) (Subtilisin-like proprotein convertase 4) (SPC4) [ <i>Homo sapiens</i> ] | 1             |
| gi110864041 reflNP_067053.1    | myeloid/lymphoid or mixed-lineage leukemia 3 isoform 1 [ <i>Homo sapiens</i> ]                                                                                                                                                            | 1             |
| gi4885629 reflNP_005414.1      | trefoil factor 2 precursor [ <i>Homo sapiens</i> ]                                                                                                                                                                                        | 1             |
| gi7657685 reflNP_055172.1      | late cornified envelope 2B [ <i>Homo sapiens</i> ]                                                                                                                                                                                        | 1             |
| gi4502461 reflNP_001720.1      | betacellulin [ <i>Homo sapiens</i> ]                                                                                                                                                                                                      | 1             |
| gi31543161 reflNP_659452.2     | MAS-related GPR, member F [ <i>Homo sapiens</i> ]                                                                                                                                                                                         | 1             |
| gi118252045 reflNP_079496.1    | ADAM metalloproteinase domain 33 isoform alpha preproprotein [ <i>Homo sapiens</i> ]                                                                                                                                                      | 1             |
| gi23097299 reflNP_064714.1     | pappalysin 2 isoform 1 [ <i>Homo sapiens</i> ]                                                                                                                                                                                            | 1             |
| gi34577055 reflNP_115521.3     | F-box only protein 30 [ <i>Homo sapiens</i> ]                                                                                                                                                                                             | 1             |
| gi40316952 reflNP_659441.2     | a disintegrin and metalloprotease domain 32                                                                                                                                                                                               | 1             |

| GenBank                       | Common name                                                                       | No. of motifs |
|-------------------------------|-----------------------------------------------------------------------------------|---------------|
| gi 30387642 refNP_848133.1    | [Homo sapiens]<br>late cornified envelope 4A [Homo sapiens]                       | 1             |
| gi 57529737 refNP_055824.1    | PDZ domain containing RING finger 3 [Homo sapiens]                                | 1             |
| gi 5453764 refNP_006148.1     | nel-like 1 precursor [Homo sapiens]                                               | 1             |
| gi 30410041 refNP_848520.1    | late cornified envelope 3B [Homo sapiens]                                         | 1             |
| gi 91718902 refNP_733751.2    | myeloid/lymphoid or mixed-lineage leukemia 3 isoform 2 [Homo sapiens]             | 1             |
| gi 55743080 refNP_001455.3    | ADAM metalloproteinase domain 2 proprotein [Homo sapiens]                         | 1             |
| gi 32401445 refNP_861449.1    | sprouty-related protein with EVH-1 domain 2 [Homo sapiens]                        | 1             |
| gi 30410045 refNP_848515.1    | late cornified envelope 2A [Homo sapiens]                                         | 1             |
| gi 54292117 refNP_068547.2    | ADAM metalloproteinase domain 28 isoform 3 proprotein [Homo sapiens]              | 1             |
| gi 5730095 refNP_001552.2     | tumor necrosis factor receptor superfamily, member 9 precursor [Homo sapiens]     | 1             |
| gi 4757722 refNP_004185.1     | ADAM metalloproteinase domain 22 isoform 4 proprotein [Homo sapiens]              | 1             |
| gi 89191868 refNP_000543.2    | von Willebrand factor preproprotein [Homo sapiens]                                | 1             |
| gi 31881770 refNP_068566.2    | ADAM metalloproteinase domain 30 proprotein [Homo sapiens]                        | 1             |
| gi 40538726 refNP_005832.1    | sprouty homolog 1, antagonist of FGF signaling [Homo sapiens]                     | 1             |
| gi 5032115 refNP_005833.1     | sprouty 2 [Homo sapiens]                                                          | 1             |
| gi 13424500 refXP_001133620.1 | PREDICTED: similar to transmembrane protein 28 [Homo sapiens]                     | 1             |
| gi 13249342 refNP_077721.1    | outer dense fiber of sperm tails 1 [Homo sapiens]                                 | 1             |
| gi 45580730 refNP_861522.2    | 2-aminoadipic 6-semialdehyde dehydrogenase [Homo sapiens]                         | 1             |
| gi 30348954 refNP_065825.1    | mindbomb homolog 1 [Homo sapiens]                                                 | 1             |
| gi 46909592 refNP_997074.1    | a disintegrin and metalloproteinase domain 15 isoform 1 proprotein [Homo sapiens] | 1             |

| GenBank                                                                                                                                                    | Common name                                                                                                                                                                                                                                                                                                                                                                 | No. of motifs |
|------------------------------------------------------------------------------------------------------------------------------------------------------------|-----------------------------------------------------------------------------------------------------------------------------------------------------------------------------------------------------------------------------------------------------------------------------------------------------------------------------------------------------------------------------|---------------|
| gil17981704 reflNP_005183.2 <br>gil13699811 reflNP_075447.1                                                                                                | cyclin-dependent kinase inhibitor 3 [Homo sapiens]                                                                                                                                                                                                                                                                                                                          | 1             |
| gil66932982 reflNP_060026.2 <br>gil82524844 reflNP_001400.2                                                                                                | WHSC1L1 protein isoform long [Homo sapiens]<br>filamin-binding LIM protein-1 isoform a [Homo sapiens]                                                                                                                                                                                                                                                                       | 1             |
| gil7656861 reflNP_055052.1 <br>gil23097301 reflNP_068755.1                                                                                                 | EGF-like-domain, multiple 3 [Homo sapiens]<br>ADAM metalloproteinase domain 18<br>preproprotein [Homo sapiens]<br>pappalysin 2 isoform 2 [Homo sapiens]                                                                                                                                                                                                                     | 1             |
| gil66932988 reflNP_001019387.1 <br>gil39930511 reflNP_597716.1                                                                                             | filamin-binding LIM protein-1 isoform c [Homo sapiens]<br>collagen and calcium binding EGF domains 1<br>[Homo sapiens]                                                                                                                                                                                                                                                      | 1             |
| gil38045915 reflNP_002572.2 <br>gil8922800 reflNP_060758.1 <br>gil23308574 reflNP_112226.2 <br>gil56118212 reflNP_055872.2                                 | pregnancy-associated plasma protein A<br>preproprotein [Homo sapiens]<br>PHD finger protein 10 isoform a [Homo sapiens]<br>sprouty homolog 4 [Homo sapiens]<br>MYC binding protein 2 [Homo sapiens]                                                                                                                                                                         | 1             |
| gil4505865 reflNP_002650.1 <br>gil28893581 reflNP_796372.1 <br>gil28603846 reflNP_776192.1 <br>gil30410035 reflNP_848525.1 <br>gil30410047 reflNP_848516.1 | plasminogen activator, urokinase receptor<br>isoform 1 precursor [Homo sapiens]<br>LIM homeobox transcription factor 1, alpha<br>isoform a [Homo sapiens]<br>zinc finger protein 707 [Homo sapiens]<br>late cornified envelope 5A [Homo sapiens]<br>late cornified envelope 2C [Homo sapiens]<br>colony stimulating factor 3 receptor isoform a<br>precursor [Homo sapiens] | 1             |
| gil4503081 reflNP_000751.1 <br>gil13236492 reflNP_077028.1 <br>gil27501452 reflNP_005831.1 <br>gil11321571 reflNP_003053.1 <br>gil4507061 reflNP_003052.1  | lymphocyte antigen 6 complex G6E [Homo sapiens]<br>sprouty homolog 3 [Homo sapiens]<br>slit homolog 3 [Homo sapiens]<br>slit homolog 1 [Homo sapiens]<br>a disintegrin and metalloproteinase domain 15<br>isoform 5 preproprotein [Homo sapiens]                                                                                                                            | 1             |
| gil46909598 reflNP_997079.1                                                                                                                                |                                                                                                                                                                                                                                                                                                                                                                             | 1             |

| GenBank                        | Common name                                                                          | No. of motifs |
|--------------------------------|--------------------------------------------------------------------------------------|---------------|
| gil13421167reflXP_001130956.1l | PREDICTED: similar to sterile alpha motif domain containing 6 [Homo sapiens]         | 1             |
| gil61743980reflNP_060034.9l    | stabilin 2 precursor [Homo sapiens]                                                  | 1             |
| gil46909596reflNP_997078.1l    | a disintegrin and metalloproteinase domain 15 isoform 4 preproprotein [Homo sapiens] | 1             |
| gil46909590reflNP_003806.3l    | a disintegrin and metalloproteinase domain 15 isoform 2 preproprotein [Homo sapiens] | 1             |
| gil46909594reflNP_997077.1l    | a disintegrin and metalloproteinase domain 15 isoform 3 preproprotein [Homo sapiens] | 1             |
| gil56676337reflNP_056501.2l    | transmembrane protein 28 [Homo sapiens]                                              | 1             |
| gil46909600reflNP_997080.1l    | a disintegrin and metalloproteinase domain 15 isoform 6 preproprotein [Homo sapiens] | 1             |
| gil89025601reflXP_932976.1l    | PREDICTED: hypothetical protein [Homo sapiens]                                       | 1             |
| gil19923586reflNP_071900.2l    | nuclear receptor binding SET domain protein 1 isoform b [Homo sapiens]               | 1             |
| gil13324677reflNP_006199.1l    | pyrophosphatase/phosphodiesterase 1 [Homo sapiens]                                   | 1             |
| gil33667040reflNP_789781.2l    | NACHT, leucine rich repeat and PYD containing 8 [Homo sapiens]                       | 1             |
| gil23308519reflNP_694571.1l    | prickle-like 1 [Homo sapiens]                                                        | 1             |
| gil31657107reflNP_570966.1l    | WAP four-disulfide core domain 8 precursor [Homo sapiens]                            | 1             |
| gil10092639reflNP_057525.1l    | cysteine-rich motor neuron 1 [Homo sapiens]                                          | 1             |
| gil27437045reflNP_758519.1l    | colony stimulating factor 3 receptor isoform d precursor [Homo sapiens]              | 1             |
| gil4507065reflNP_003055.1l     | secretory leukocyte peptidase inhibitor precursor [Homo sapiens]                     | 1             |
| gil52218862reflNP_001004487.1l | olfactory receptor, family 13, subfamily J, member 1 [Homo sapiens]                  | 1             |
| gil4505053reflNP_002340.1l     | lymphocyte antigen 75 [Homo sapiens]                                                 | 1             |
| gil85986587reflNP_001034254.1l | MAS-related GPR, member E [Homo sapiens]                                             | 1             |
| gil13424238reflXP_001128712.1l | PREDICTED: similar to transmembrane protein 28 [Homo sapiens]                        | 1             |

| GenBank                       | Common name                                                                                                                                                       | No. of motifs |
|-------------------------------|-------------------------------------------------------------------------------------------------------------------------------------------------------------------|---------------|
| gi1265037 refNP_055058.1      | ADAM metalloproteinase with thrombospondin type 1 motif, 3 proprotein [Homo sapiens]                                                                              | 1             |
| gi130410043 refNP_848517.1    | late cornified envelope 2D [Homo sapiens]<br>vascular endothelial growth factor D preproprotein [Homo sapiens]                                                    | 1             |
| gi14758378 refNP_004460.1     | PREDICTED: similar to Mucin-5B precursor (Mucin 5 subtype B, tracheobronchial) (High molecular weight salivary mucin MG1) (Sublingual gland mucin) [Homo sapiens] | 1             |
| gi113422232 refXP_001126093.1 | metallothionein 3 [Homo sapiens]                                                                                                                                  | 1             |
| gi15174762 refNP_005945.1     | LIM domain only 6 [Homo sapiens]                                                                                                                                  | 1             |
| gi17710129 refNP_006141.2     | CEGP1 protein [Homo sapiens]                                                                                                                                      | 1             |
| gi110190748 refNP_066025.1    | WAP four-disulfide core domain 5 precursor [Homo sapiens]                                                                                                         | 1             |
| gi121717822 refNP_663627.1    | colony stimulating factor 3 receptor isoform b precursor [Homo sapiens]                                                                                           | 1             |
| gi127437042 refNP_724780.2    | agrin [Homo sapiens]                                                                                                                                              | 1             |
| gi154873613 refNP_940978.2    | PREDICTED: hypothetical protein [Homo sapiens]                                                                                                                    | 1             |
| gi113423574 refXP_933414.2    | late cornified envelope 3A [Homo sapiens]                                                                                                                         | 1             |
| gi130410039 refNP_848518.1    | ADAM metalloproteinase with thrombospondin type 1 motif, 6 preproprotein [Homo sapiens]                                                                           | 1             |
| gi164276808 refNP_922932.2    | sprouty homolog 1, antagonist of FGF signaling [Homo sapiens]                                                                                                     | 1             |
| gi140788001 refNP_955359.1    | thrombospondin, type I, domain containing 4 [Homo sapiens]                                                                                                        | 1             |
| gi194536854 refNP_079093.2    | ADAM metalloproteinase with thrombospondin type 1 motif, 7 preproprotein [Homo sapiens]                                                                           | 1             |
| gi138683827 refNP_055087.2    | ADAM metalloproteinase domain 28 isoform 1 preproprotein [Homo sapiens]                                                                                           | 1             |
| gi17656863 refNP_055080.1     | ADAM metalloproteinase with thrombospondin type 1 motif, 18 isoform 1 preproprotein [Homo sapiens]                                                                | 1             |
| gi140806187 refNP_955387.1    | odz, odd Oz/ten-m homolog 1 [Homo sapiens]                                                                                                                        | 1             |
| gi17657411 refNP_055068.1     | WAP four-disulfide core domain 8 precursor                                                                                                                        | 1             |
| gi131657105 refNP_852611.1    |                                                                                                                                                                   | 1             |

| GenBank                         | Common name                                                                | No. of motifs |
|---------------------------------|----------------------------------------------------------------------------|---------------|
| gi 40217829 ref NP_0034476.2    | [Homo sapiens]<br>G protein-coupled receptor 68 [Homo sapiens]             | 1             |
| gi 113416346 ref XP_001132645.1 | PREDICTED: similar to odd Oz/ten-m homolog<br>3 [Homo sapiens]             | 1             |
| gi 113416348 ref XP_945815.2    | PREDICTED: similar to odd Oz/ten-m homolog<br>3 isoform 4 [Homo sapiens]   | 1             |
| gi 91823274 ref NP_006200.3     | autotaxin isoform 1 preproprotein [Homo<br>sapiens]                        | 1             |
| gi 21361137 ref NP_002495.2     | nuclear transcription factor, X-box binding 1<br>isoform 1 [Homo sapiens]  | 1             |
| gi 4501897 ref NP_001607.1      | activin A receptor, type IIA precursor [Homo<br>sapiens]                   | 1             |
| gi 113417289 ref XP_950879.2    | PREDICTED: similar to odd Oz/ten-m homolog<br>2 isoform 5 [Homo sapiens]   | 1             |
| gi 89030141 ref XP_932125.1     | PREDICTED: similar to ADAMTS-like 2<br>[Homo sapiens]                      | 1             |
| gi 88989530 ref XP_947301.1     | PREDICTED: similar to odd Oz/ten-m homolog<br>2 isoform 4 [Homo sapiens]   | 1             |
| gi 27477095 ref NP_758859.1     | nuclear receptor binding SET domain protein 1<br>isoform a [Homo sapiens]  | 1             |
| gi 88989527 ref XP_950881.1     | PREDICTED: similar to odd Oz/ten-m homolog<br>2 isoform 6 [Homo sapiens]   | 1             |
| gi 5453766 ref NP_006150.1      | nel-like 2 [Homo sapiens]                                                  | 1             |
| gi 11497043 ref NP_068367.1     | ADAM metalloproteinase domain 22 isoform 5<br>preproprotein [Homo sapiens] | 1             |
| gi 21536386 ref NP_068368.2     | ADAM metalloproteinase domain 22 isoform 2<br>preproprotein [Homo sapiens] | 1             |
| gi 11497047 ref NP_068369.1     | ADAM metalloproteinase domain 22 isoform 1<br>preproprotein [Homo sapiens] | 1             |
| gi 56699495 ref NP_006094.3     | WAP four-disulfide core domain 2 isoform 1<br>precursor [Homo sapiens]     | 1             |
| gi 113412362 ref XP_001127514.1 | PREDICTED: hypothetical protein [Homo<br>sapiens]                          | 1             |
| gi 50845382 ref NP_003805.3     | ADAM metalloproteinase domain 20<br>preproprotein [Homo sapiens]           | 1             |

| GenBank                         | Common name                                                                                            | No. of motifs |
|---------------------------------|--------------------------------------------------------------------------------------------------------|---------------|
| gil113412366 reflXP_001127560.1 | PREDICTED: late cornified envelope 1E<br>[Homo sapiens]                                                | 1             |
| gi134335256 reflNP_003808.1     | a disintegrin and metalloproteinase domain 7<br>[Homo sapiens]                                         | 1             |
| gi161966727 reflNP_001013661.1  | hypothetical protein LOC388438 [Homo sapiens]                                                          | 1             |
| gi161966723 reflNP_001013659.1  | hypothetical protein LOC388022 [Homo sapiens]                                                          | 1             |
| gi22749057 reflNP_689722.1      | hypothetical protein LOC150244 [Homo sapiens]                                                          | 1             |
| gi19966777 reflNP_065148.1      | resistin [Homo sapiens]                                                                                | 1             |
| gi24041040 reflNP_694882.1      | ADAM metalloproteinase domain 33 isoform beta preproprotein [Homo sapiens]                             | 1             |
| gi131377685 reflNP_079048.2     | zinc finger, MYM domain containing 1 [Homo sapiens]                                                    | 1             |
| gi113420361 reflXP_001131733.1  | PREDICTED: similar to ADAM 32 precursor (A disintegrin and metalloproteinase domain 32) [Homo sapiens] | 1             |
| gi14585710 reflNP_002381.2      | ADAM metalloproteinase domain 11 preproprotein [Homo sapiens]                                          | 1             |
| gi173747887 reflNP_067673.2     | ADAM metalloproteinase domain 12 isoform 2 preproprotein [Homo sapiens]                                | 1             |
| gi182659109 reflNP_065816.2     | retinoblastoma-associated factor 600 [Homo sapiens]                                                    | 1             |
| gi22212927 reflNP_667345.1      | nuclear transcription factor, X-box binding 1 isoform 3 [Homo sapiens]                                 | 1             |
| gi173747885 reflNP_003465.3     | ADAM metalloproteinase domain 12 isoform 1 preproprotein [Homo sapiens]                                | 1             |
| gi113426072 reflXP_001133086.1  | PREDICTED: hypothetical protein [Homo sapiens]                                                         | 1             |
| gi22212925 reflNP_667344.1      | nuclear transcription factor, X-box binding 1 isoform 2 [Homo sapiens]                                 | 1             |
| gi14505037 reflNP_003564.1      | latent transforming growth factor beta binding protein 4 [Homo sapiens]                                | 1             |
| gi21536383 reflNP_057435.2      | ADAM metalloproteinase domain 22 isoform 3                                                             | 1             |

| GenBank                         | Common name                                                                                          | No. of motifs |
|---------------------------------|------------------------------------------------------------------------------------------------------|---------------|
| gi14501915 reflNP_003807.1      | preproprotein [Homo sapiens]<br>ADAM metallopeptidase domain 9 isoform 1<br>precursor [Homo sapiens] | 1             |
| gi11342331 6 reflXP_497341.3    | PREDICTED: similar to mucin 19 [Homo sapiens]                                                        | 1             |
| gi40018612 reflNP_951038.1      | MyoD family inhibitor domain containing isoform p40 [Homo sapiens]                                   | 1             |
| gi11341188 1 reflXP_001126326.1 | PREDICTED: similar to agrin [Homo sapiens]                                                           | 1             |
| gi28195390 reflNP_689829.2      | tripartite motif-containing 42 [Homo sapiens]                                                        | 1             |
| gi24430146 reflNP_005115.2      | nucleoporin 153kDa [Homo sapiens]                                                                    | 1             |
| gi115451844 reflNP_150377.1     | ADAM metallopeptidase domain 19 isoform 2<br>preproprotein [Homo sapiens]                            | 1             |
| gi6912512 reflNP_036462.1       | MYST histone acetyltransferase (monocytic leukemia) 4 [Homo sapiens]                                 | 1             |
| gi11342401 1 reflXP_941531.2    | PREDICTED: hypothetical protein [Homo sapiens]                                                       | 1             |
| gi33300657 reflNP_877435.1      | WD repeat domain 72 [Homo sapiens]                                                                   | 1             |
| gi51873049 reflNP_003695.3      | hypothetical protein LOC8603 [Homo sapiens]                                                          | 1             |
| gi30410037 reflNP_848521.1      | late cornified envelope 3C [Homo sapiens]                                                            | 1             |
| gi113415473 reflXP_001127674.1  | PREDICTED: hypothetical protein [Homo sapiens]                                                       | 1             |
| gi189257346 reflNP_005284.2     | G protein-coupled receptor 20 [Homo sapiens]<br>activin A type IIB receptor precursor [Homo sapiens] | 1             |
| gi14501899 reflNP_001097.1      | F-box protein 40 [Homo sapiens]                                                                      | 1             |
| gi17706493 reflNP_057382.1      | late cornified envelope 1A [Homo sapiens]                                                            | 1             |
| gi30387654 reflNP_848125.1      | late cornified envelope 1B [Homo sapiens]                                                            | 1             |
| gi30387656 reflNP_848126.1      | late cornified envelope 1D [Homo sapiens]                                                            | 1             |
| gi30387648 reflNP_848129.1      | latent transforming growth factor beta binding protein 2 [Homo sapiens]                              | 1             |
| gi4557733 reflNP_000419.1       | PHD finger protein 10 isoform b [Homo sapiens]                                                       | 1             |
| gi119747276 reflNP_579866.1     | slit homolog 2 [Homo sapiens]                                                                        | 1             |
| gi4759146 reflNP_004778.1       | late cornified envelope 1F [Homo sapiens]                                                            | 1             |
| gi30387646 reflNP_848131.1      | activin A receptor, type IC [Homo sapiens]                                                           | 1             |
| gi21687098 reflNP_660302.1      | activin A receptor, type IC [Homo sapiens]                                                           | 1             |

| GenBank                         | Common name                                                                                                                                                       | No. of motifs |
|---------------------------------|-------------------------------------------------------------------------------------------------------------------------------------------------------------------|---------------|
| gi 52317120 ref NP_001004738.1  | olfactory receptor, family 5, subfamily L, member 1 [Homo sapiens]                                                                                                | 1             |
| gi 56121815 ref NP_112219.2     | ADAM metalloproteinase with thrombospondin type 1 motif, 10 preproprotein [Homo sapiens]                                                                          | 1             |
| gi 15451842 ref NP_075525.2     | ADAM metalloproteinase domain 19 isoform 1 preproprotein [Homo sapiens]                                                                                           | 1             |
| gi 20336246 ref NP_006191.2     | proprotein convertase subtilisin/kexin type 5 preproprotein [Homo sapiens]                                                                                        | 1             |
| gi 38016904 ref NP_061905.2     | thrombospondin repeat containing 1 isoform 1 [Homo sapiens]                                                                                                       | 1             |
| gi 91823602 ref NP_001035181.1  | autotaxin isoform 2 preproprotein [Homo sapiens]                                                                                                                  | 1             |
| gi 54792100 ref NP_001973.2     | erbB-3 isoform 1 precursor [Homo sapiens]                                                                                                                         | 1             |
| gi 4505285 ref NP_002448.1      | mucin 2 [Homo sapiens]                                                                                                                                            | 1             |
| gi 67190163 ref NP_005798.2     | proteoglycan 4 [Homo sapiens]                                                                                                                                     | 1             |
| gi 37655167 ref NP_115698.3     | ring finger protein 135 isoform 1 [Homo sapiens]                                                                                                                  | 1             |
| gi 113423047 ref XP_945556.2    | PREDICTED: similar to odd Oz/ten-m homolog 4 [Homo sapiens]                                                                                                       | 1             |
| gi 52317130 ref NP_001004739.1  | olfactory receptor, family 5, subfamily L, member 2 [Homo sapiens]                                                                                                | 1             |
| gi 32171177 ref NP_037529.2     | over-expressed breast tumor protein [Homo sapiens]                                                                                                                | 1             |
| gi 4826896 ref NP_005012.1      | ectonucleotide                                                                                                                                                    | 1             |
| gi 37675280 ref NP_932352.1     | pyrophosphatase/phosphodiesterase 3 [Homo sapiens]                                                                                                                | 1             |
| gi 113423720 ref XP_941683.2    | jub, ajuba homolog isoform 2 [Homo sapiens]<br>PREDICTED: similar to mucin 19 [Homo sapiens]                                                                      | 1             |
| gi 113422727 ref XP_001129427.1 | PREDICTED: similar to Mucin-5B precursor (Mucin 5 subtype B, tracheobronchial) (High molecular weight salivary mucin MG1) (Sublingual gland mucin) [Homo sapiens] | 1             |
| gi 28626521 ref NP_066363.1     | zinc finger, NFX1-type containing 1 [Homo sapiens]                                                                                                                | 1             |

| GenBank                       | Common name                                                                                                     | No. of motifs |
|-------------------------------|-----------------------------------------------------------------------------------------------------------------|---------------|
| gi20336180 reflNP_612192.1    | paired basic amino acid cleaving system 4 isoform b preproprotein [Homo sapiens]                                | 1             |
| gi4505577 reflNP_002561.1     | paired basic amino acid cleaving system 4 isoform a preproprotein [Homo sapiens]                                | 1             |
| gi4505861 reflNP_000921.1     | plasminogen activator, tissue type isoform 1 preproprotein [Homo sapiens]                                       | 1             |
| gi113426454 reflXP_944705.2   | PREDICTED: similar to Metallothionein-2 (MT-2) (Metallothionein-II) (MT-II) (Metallothionein-2A) [Homo sapiens] | 1             |
| gi23238194 reflNP_683699.1    | tumor necrosis factor receptor superfamily, member 18 isoform 2 precursor [Homo sapiens]                        | 1             |
| gi93004088 reflNP_055215.2    | GPI-anchored metastasis-associated protein homolog [Homo sapiens]                                               | 1             |
| gi5031905 reflNP_005577.1     | MyoD family inhibitor [Homo sapiens]                                                                            | 1             |
| gi22027612 reflNP_066961.2    | TNF receptor-associated factor 2 [Homo sapiens]                                                                 | 1             |
| gi38524620 reflNP_942559.1    | prickle-like 2 [Homo sapiens]                                                                                   | 1             |
| gi9506923 reflNP_061933.1     | chromosome 1 open reading frame 42 [Homo sapiens]                                                               | 1             |
| gi4505007 reflNP_002307.1     | LIM homeobox transcription factor 1, beta [Homo sapiens]                                                        | 1             |
| gi14702167 reflNP_000922.2    | plasminogen activator, tissue type isoform 2 precursor [Homo sapiens]                                           | 1             |
| gi30387650 reflNP_848130.1    | late cornified envelope 1E [Homo sapiens]                                                                       | 1             |
| gi25121989 reflNP_109588.2    | sperm mitochondria-associated cysteine-rich protein [Homo sapiens]                                              | 1             |
| gi11497040 reflNP_003804.1    | ADAM metalloproteinase domain 21 preproprotein [Homo sapiens]                                                   | 1             |
| gi54292121 reflNP_001005845.1 | ADAM metalloproteinase domain 9 isoform 2 precursor [Homo sapiens]                                              | 1             |
| gi46195707 reflNP_001401.1    | EGF-like-domain, multiple 4 [Homo sapiens]                                                                      | 1             |
| gi4757886 reflNP_004330.1     | pituitary tumor-transforming gene 1 protein-interacting protein precursor [Homo sapiens]                        | 1             |
| gi27894287 reflNP_775463.1    | PHD finger protein 7 isoform 2 [Homo sapiens]                                                                   | 1             |
| gi113415868 reflXP_936693.2   | PREDICTED: similar to odd Oz/ten-m homolog                                                                      | 1             |

| GenBank | Common name                | No. of motifs |
|---------|----------------------------|---------------|
|         | 3 isoform 3 [Homo sapiens] |               |
